# Supplementary material for: Reactions of cerium complexes with transition metal nitrides: synthesis and structure of heterometallic cerium complexes containing bridging catecholate ligands
Source: Royal Society of Chemistry journal article supplement (doi:10.1039/c9dt02959a), 2019-01-01
Supplement: c9dt02959a1.pdf [file c9dt02959a1.pdf]

Supplementary Information for

Reactions of Cerium Complexes with Transition Metal Nitrides: Synthesis and Structure of Heterometallic Cerium Complexes Containing Bridging Catecholate Ligands

Wai-Man Cheung, Ka-Chun Au Yeung, Kai-Hong Wong, Yat-Ming So, Herman H. Y. Sung, Ian D. Williams, and Wa-Hung Leung\*

Department of Chemistry, The Hong Kong University of Science and Technology, Clear Water Bay, Kowloon, China

\*To whom correspondence should be addressed. E-mail: [chleung@ust.hk](mailto:chleung@ust.hk)

**Table of Content**

|                                                                                        | Page no. |
|----------------------------------------------------------------------------------------|----------|
| 1. Crystallographic data and experimental details for <b>4</b> , <b>6</b> and <b>9</b> | 2        |
| 2. NMR spectra                                                                         | 3-9      |
| 3. FT-IR spectrum of <b>5</b>                                                          | 10       |
| 4. UV-visible spectrum showing the trapping of NO with [Co(tp)]                        | 11       |
| 5. Cyclic voltammograms                                                                | 12-15    |

Table S1. Crystallographic data and experimental details for **4**, **6** and **9**.

|                                                                                                       | <b>4</b>                                                                                              | <b>6</b>                                                                             | <b>9</b>                                                                            |
|-------------------------------------------------------------------------------------------------------|-------------------------------------------------------------------------------------------------------|--------------------------------------------------------------------------------------|-------------------------------------------------------------------------------------|
| Formula                                                                                               | C <sub>53</sub> H <sub>111</sub> CeCl <sub>2</sub> Co <sub>3</sub> NO <sub>29</sub> P <sub>9</sub> Ru | C <sub>46</sub> H <sub>78</sub> CeCo <sub>2</sub> NO <sub>22</sub> P <sub>6</sub> Ru | C <sub>46</sub> H <sub>82</sub> CeCo <sub>2</sub> O <sub>26</sub> P <sub>6</sub> Re |
| Formula weight                                                                                        | 1994.03                                                                                               | 1541.96                                                                              | 1681.11                                                                             |
| Crystal system                                                                                        | Triclinic                                                                                             | monoclinic                                                                           | Monoclinic                                                                          |
| Space group                                                                                           | P-1                                                                                                   | C2/c                                                                                 | P2 <sub>1</sub> /c                                                                  |
| <i>a</i> , Å                                                                                          | 15.0838(5)                                                                                            | 22.9360(3)                                                                           | 11.86004(14)                                                                        |
| <i>b</i> , Å                                                                                          | 17.4193(7)                                                                                            | 13.2047(2)                                                                           | 22.5385(3)                                                                          |
| <i>c</i> , Å                                                                                          | 17.9226(7)                                                                                            | 40.2851(7)                                                                           | 24.0165(2)                                                                          |
| <i>α</i> , deg                                                                                        | 114.874(4)                                                                                            | 90                                                                                   | 90                                                                                  |
| <i>β</i> , deg                                                                                        | 92.656(3)                                                                                             | 93.4905(16)                                                                          | 99.3323(10)                                                                         |
| <i>γ</i> , deg                                                                                        | 103.838(3)                                                                                            | 90                                                                                   | 90                                                                                  |
| <i>V</i> , Å <sup>3</sup>                                                                             | 4089.1(3)                                                                                             | 12178.2(3)                                                                           | 6334.81(12)                                                                         |
| <i>Z</i>                                                                                              | 2                                                                                                     | 8                                                                                    | 4                                                                                   |
| <i>ρ</i> <sub>calc</sub> , g cm <sup>-3</sup>                                                         | 1.620                                                                                                 | 1.682                                                                                | 1.763                                                                               |
| <i>T</i> , K                                                                                          | 100.00(10)                                                                                            | 100.01(10)                                                                           | 100.15                                                                              |
| <i>μ</i> , mm <sup>-1</sup>                                                                           | 13.236                                                                                                | 13.948                                                                               | 15.222                                                                              |
| <i>F</i> (000)                                                                                        | 2040.0                                                                                                | 6264.0                                                                               | 3372.0                                                                              |
| Total reflections                                                                                     | 23782                                                                                                 | 33582                                                                                | 35347                                                                               |
| Independent reflections                                                                               | 14549                                                                                                 | 10936                                                                                | 11375                                                                               |
| <i>R</i> <sub>int</sub>                                                                               | 0.0430                                                                                                | 0.0611                                                                               | 0.0430                                                                              |
| GoF <sup>a</sup>                                                                                      | 1.021                                                                                                 | 1.017                                                                                | 1.0036                                                                              |
| <i>R</i> <sub>1</sub> , <sup>b</sup> <i>wR</i> <sub>2</sub> <sup>c</sup> [ <i>I</i> > 2σ( <i>I</i> )] | 0.0394, 0.0886                                                                                        | 0.0582, 0.1340                                                                       | 0.0367, 0.0902                                                                      |
| <i>R</i> <sub>1</sub> , <i>wR</i> <sub>2</sub> (all data)                                             | 0.0535, 0.0937                                                                                        | 0.0718, 0.1421                                                                       | 0.0450, 0.0943                                                                      |

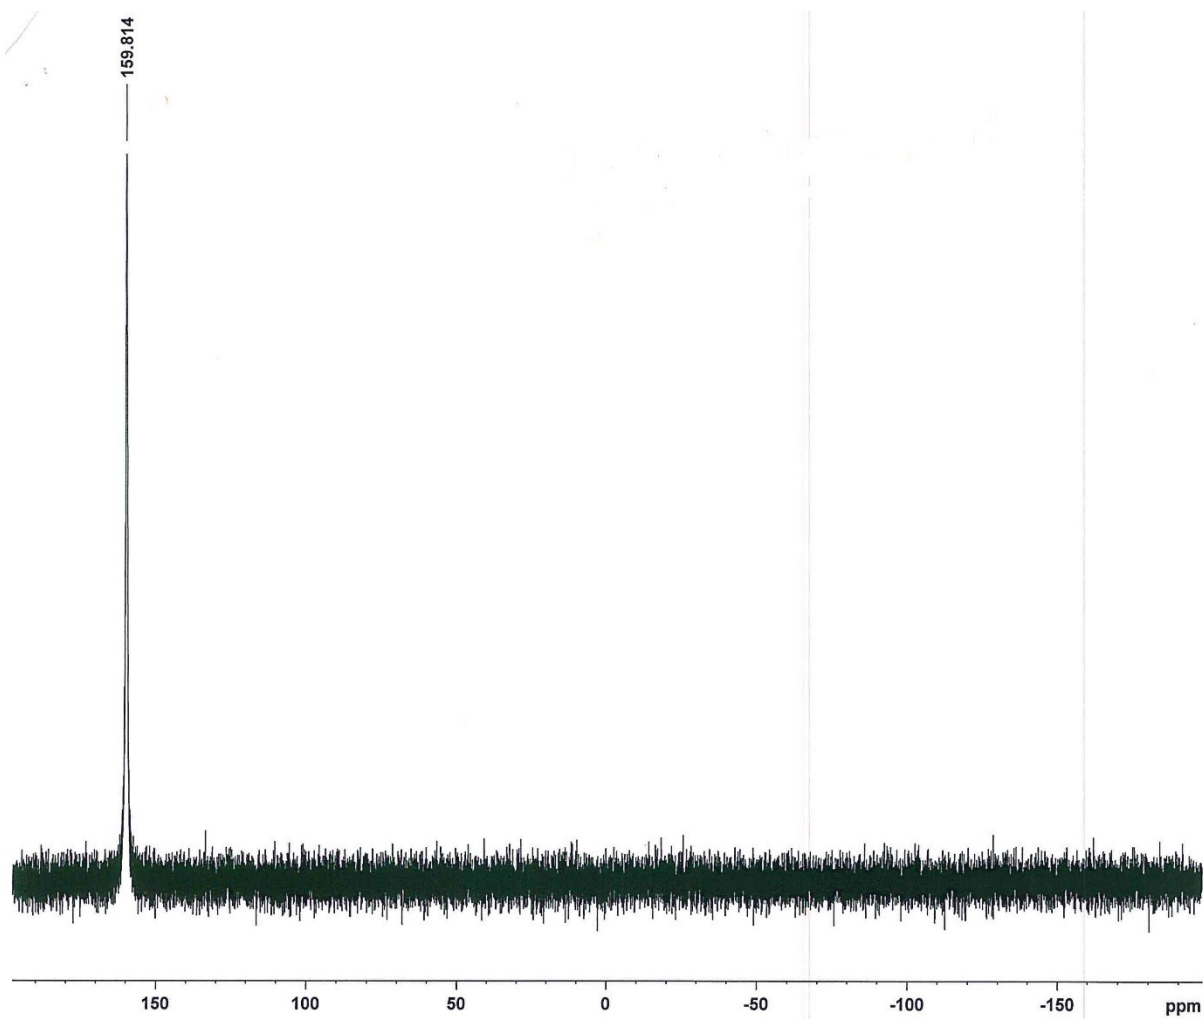

Figure S1.  $^{31}\text{P}\{^1\text{H}\}$  NMR (162 MHz, 298 K,  $\text{CD}_3\text{CN}$ ) spectrum of  $[(\text{L}_{\text{OEt}})_2(\text{H}_2\text{O})\text{Ce}^{\text{III}}\{\mu\text{-O,N-MeC(O)NH}\}\text{Ru}^{\text{III}}(\text{L}_{\text{OEt}})\text{Cl}_2]$  (**4**).

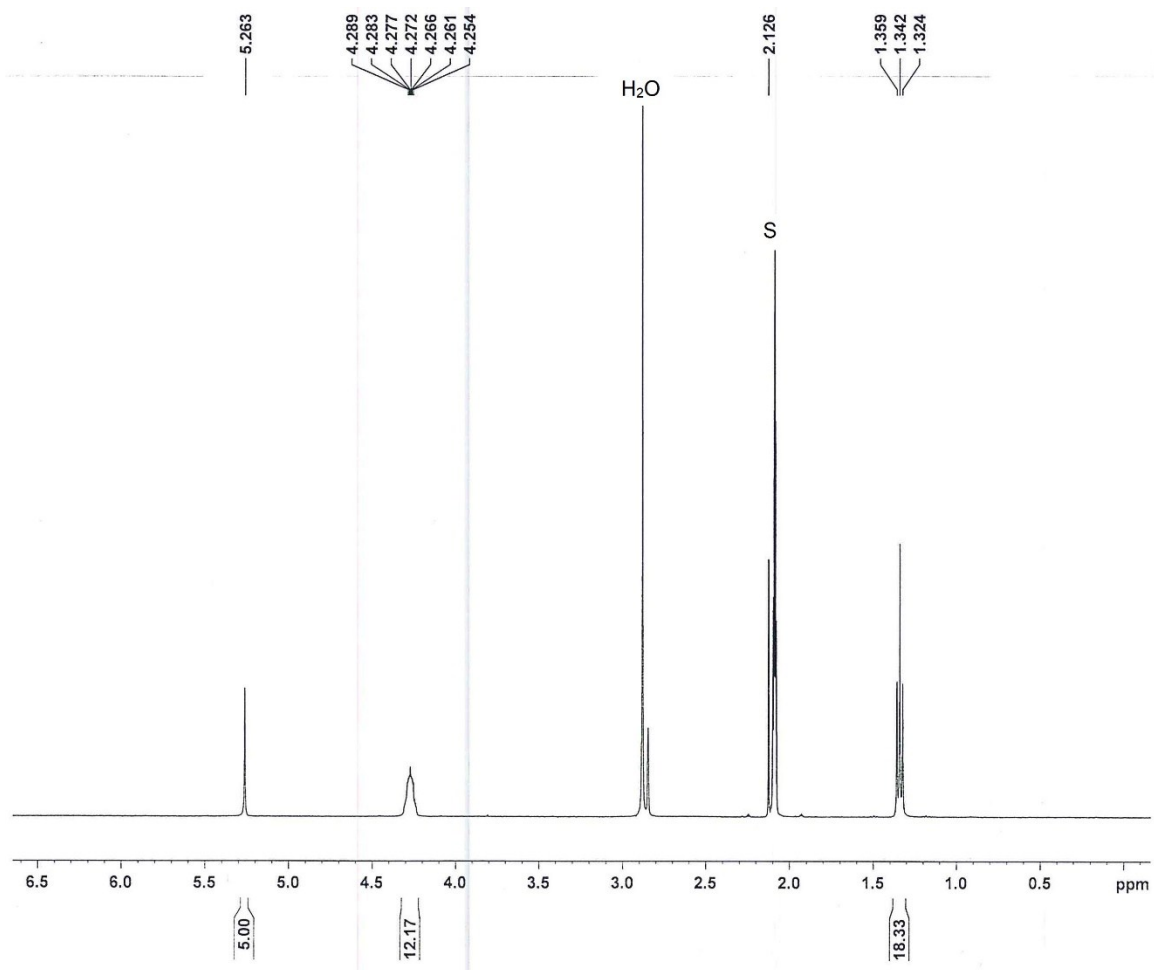

Figure S2. <sup>1</sup>H NMR (400 MHz, 298 K, acetone-*d*<sub>6</sub>) spectrum of [Ce(LOEt)<sub>2</sub>(H<sub>2</sub>O){Mn(N)(CN)<sub>4</sub>}] (**5**) (S = residual solvent).

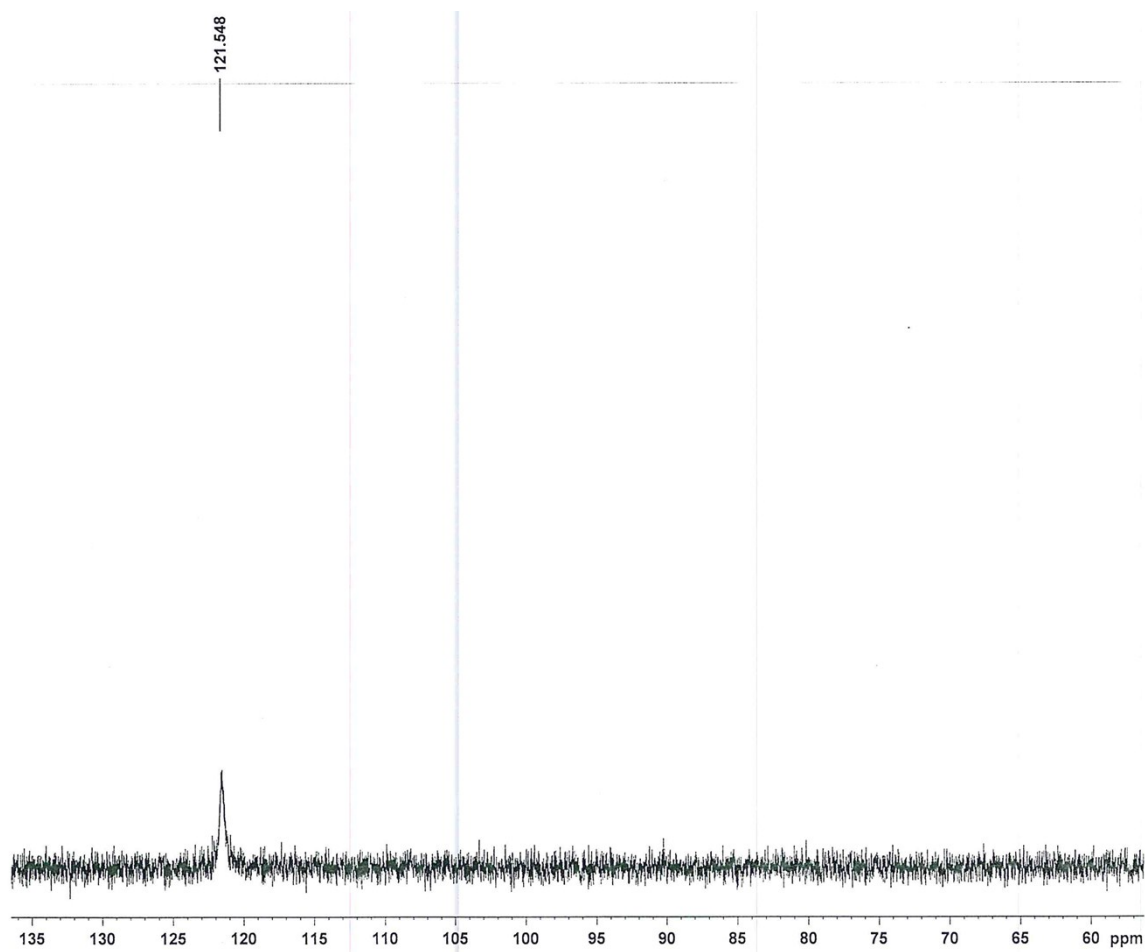

Figure S3.  $^{31}\text{P}\{^1\text{H}\}$  NMR (162 MHz, 298 K, acetone- $d_6$ ) spectrum of  $[\text{Ce}(\text{L}_{\text{OEt}})_2(\text{H}_2\text{O})\{\text{Mn}(\text{N})(\text{CN})_4\}]$  (**5**).

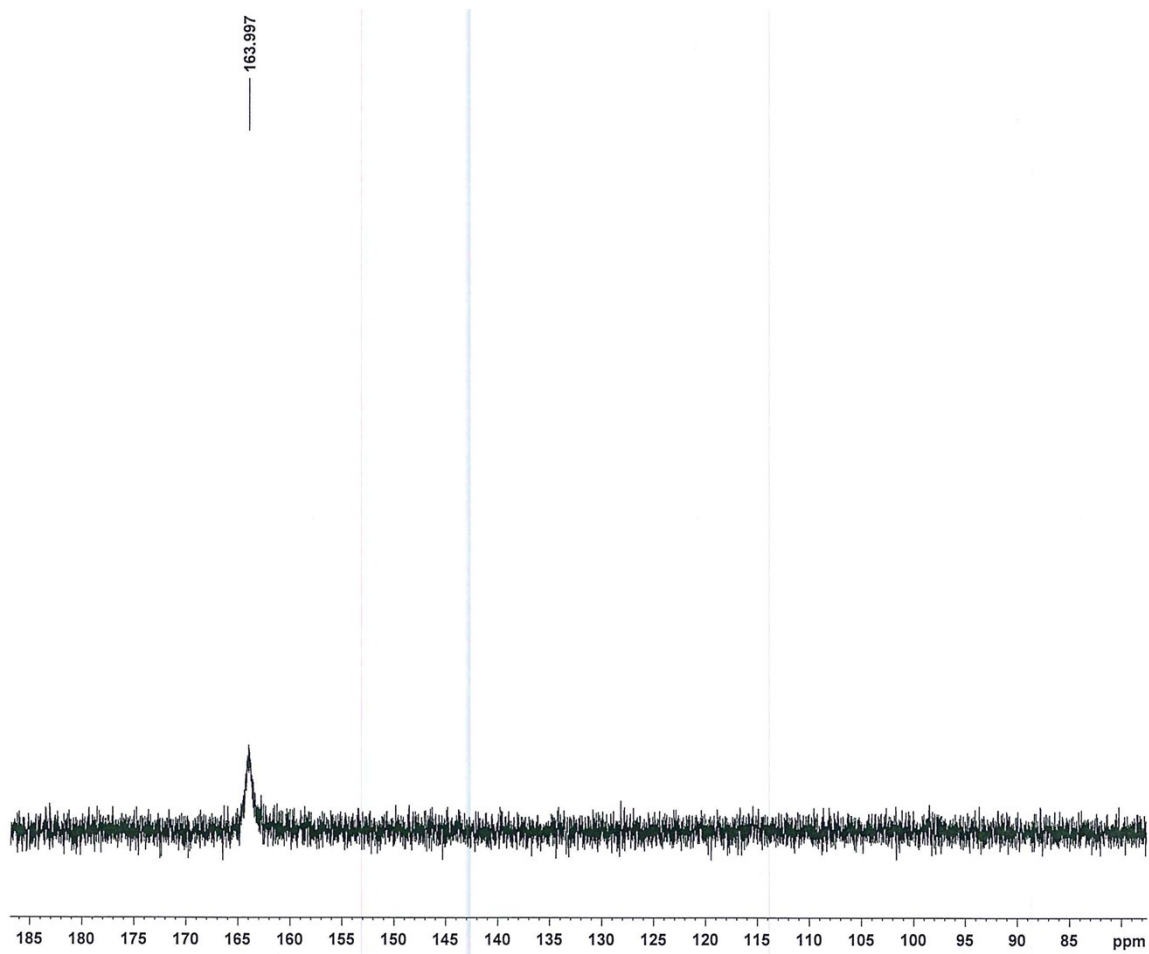

Figure S4.  $^{31}\text{P}\{^1\text{H}\}$  NMR (162 MHz, 298 K, acetone- $d_6$ ) spectrum of  $[(\text{L}_{\text{OEt}})_2\text{Ce}^{\text{III}}\{(\mu\text{-cat})_2\text{Ru}^{\text{VI}}(\text{N})\}]$  (6).

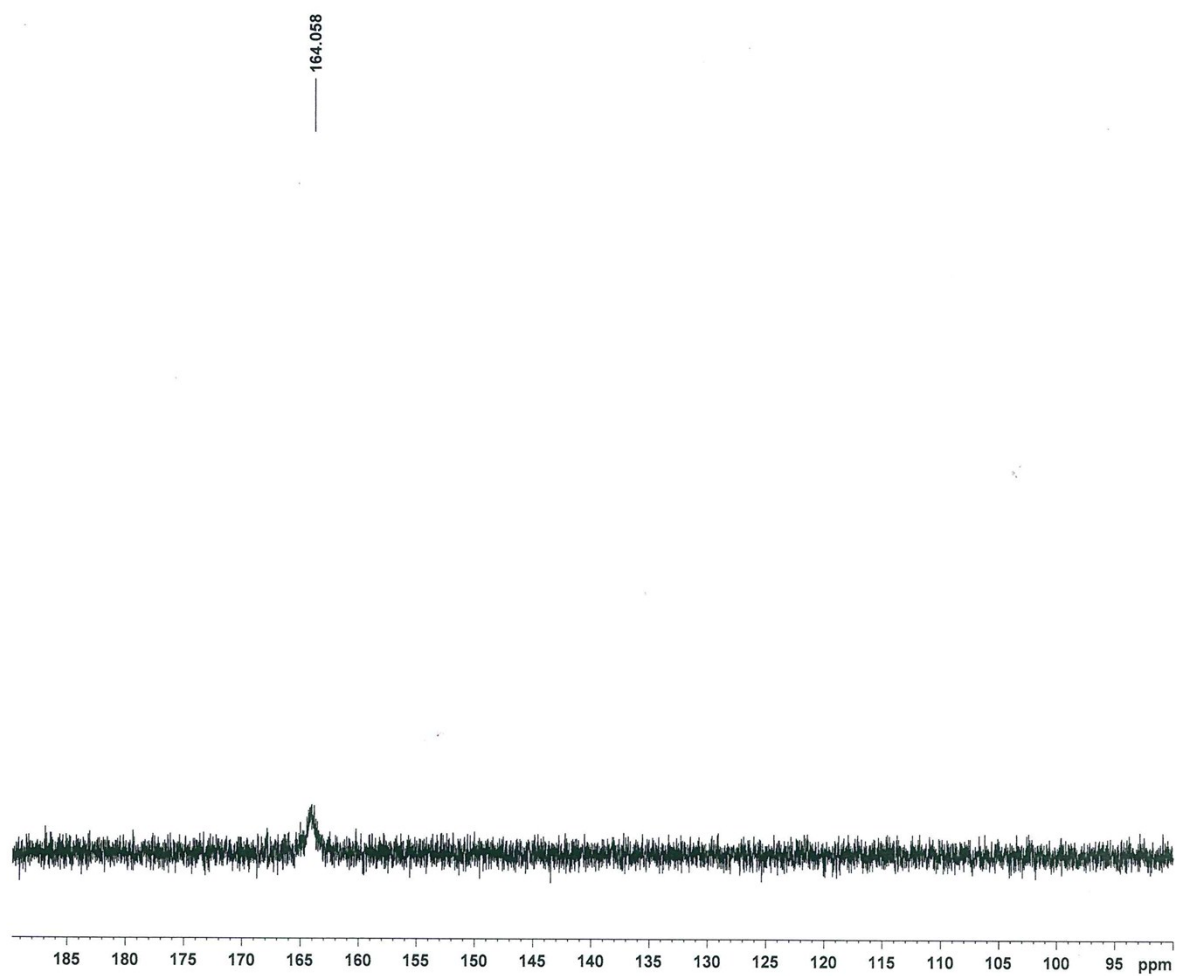

Figure S5.  $^{31}\text{P}\{^1\text{H}\}$  NMR (162 MHz, 298 K, acetone- $d_6$ ) spectrum of  $[(\text{L}_{\text{OEt}})_2\text{Ce}^{\text{III}}\{(\mu\text{-cat})_2\text{Os}^{\text{VI}}(\text{N})\}]$  (7).

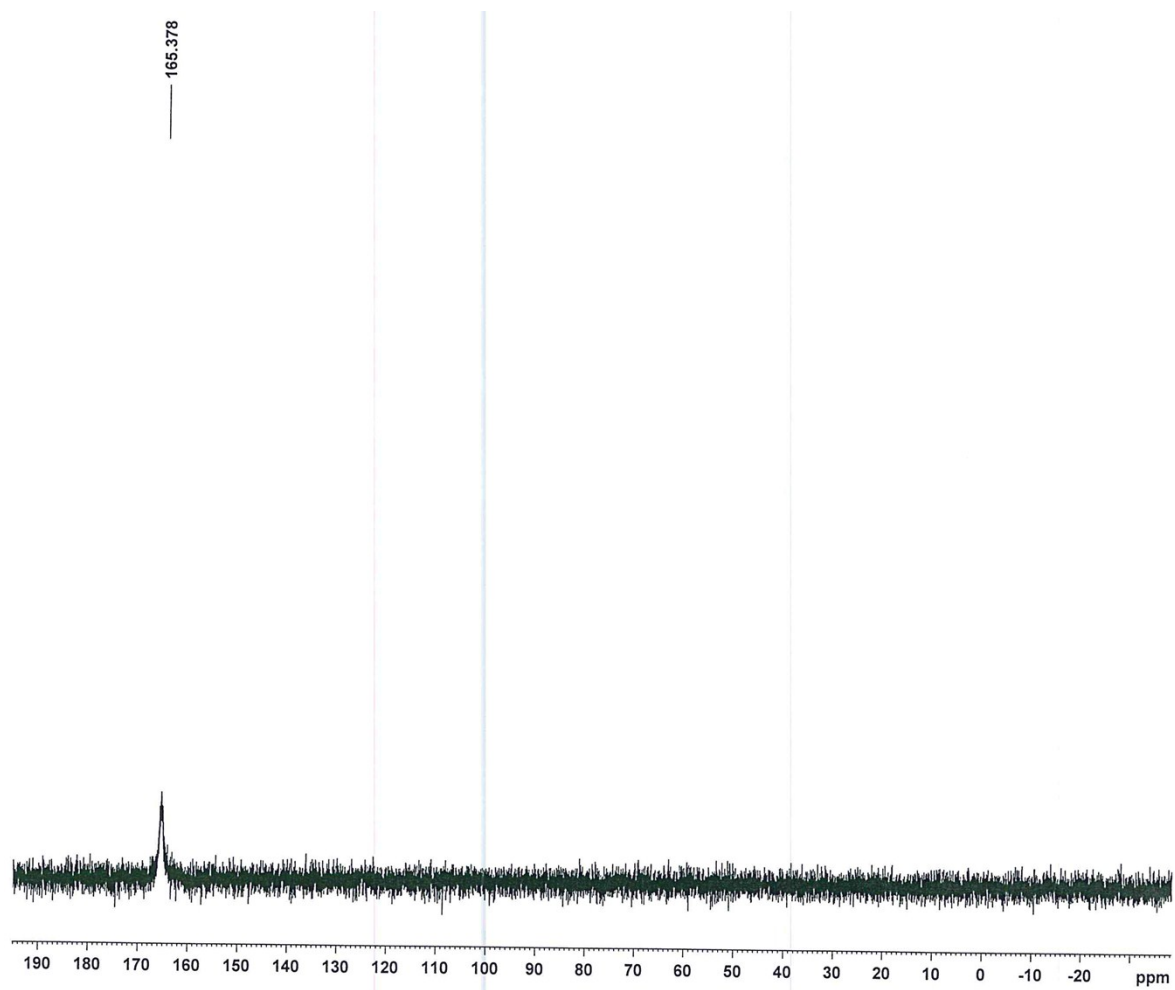

Figure S6.  $^{31}\text{P}\{^1\text{H}\}$  NMR (162 MHz, 298 K,  $\text{CDCl}_3$ ) spectrum of  $[(\text{L}_{\text{OEt}})_2\text{Ce}^{\text{III}}\{(\mu\text{-cat})_2\text{Re}^{\text{V}}(\text{O})\}]$  (**8**).



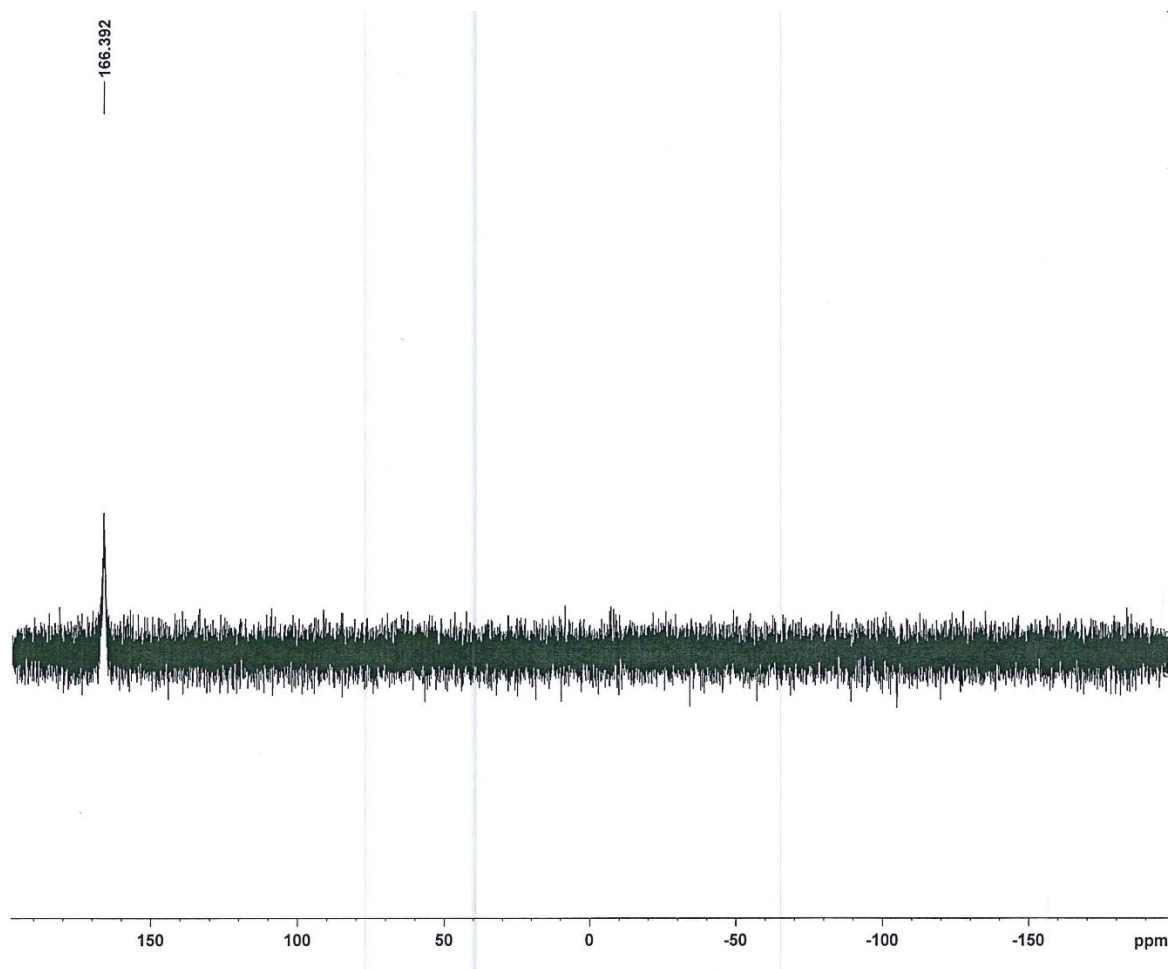

Figure S7.  $^{31}\text{P}\{^1\text{H}\}$  NMR (162 MHz, 298 K,  $\text{CDCl}_3$ ) spectrum of  $[\text{Ce}^{\text{III}}(\text{LOEt})_2(\text{H}_2\text{O})_2][\text{cis}\text{-}\{\text{Re}^{\text{VII}}(\text{O})_2(\text{cat})_2\}]$  (**9**).

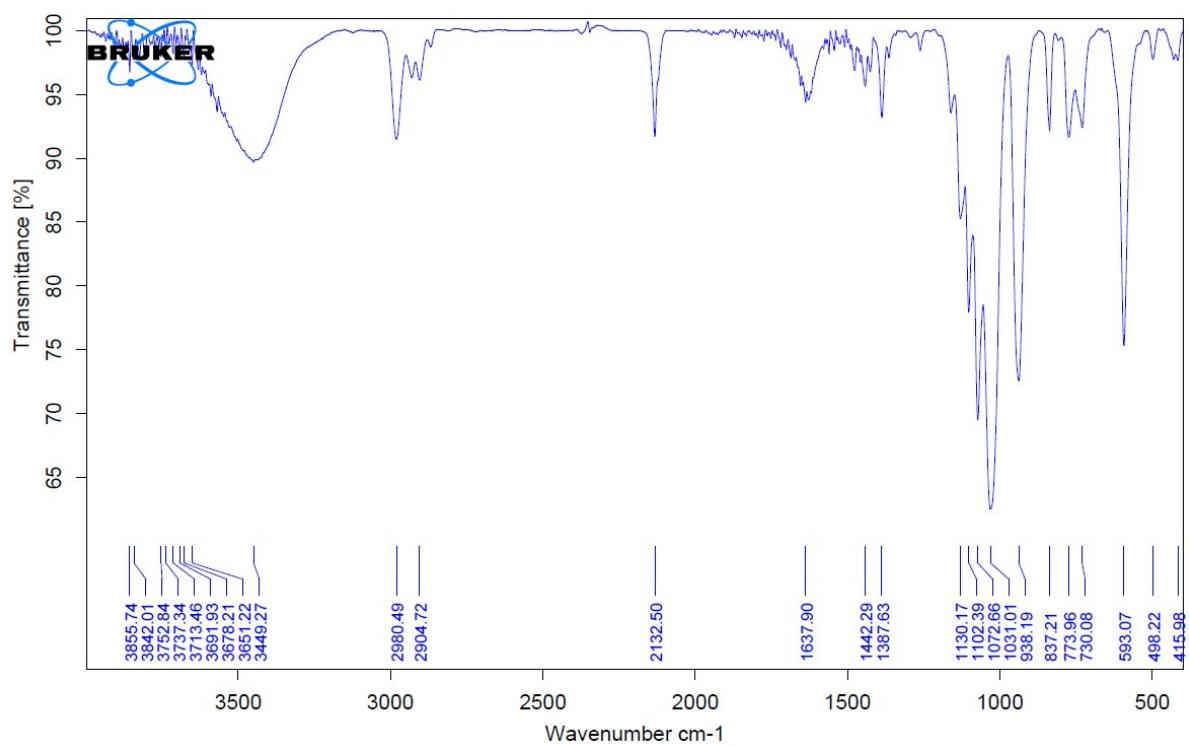

Figure S8. FT-IR spectrum of  $[\text{Ce}(\text{L}_{\text{OEt}})_2(\text{H}_2\text{O})\{\text{Mn}(\text{N})(\text{CN})_4\}]$  (**5**).

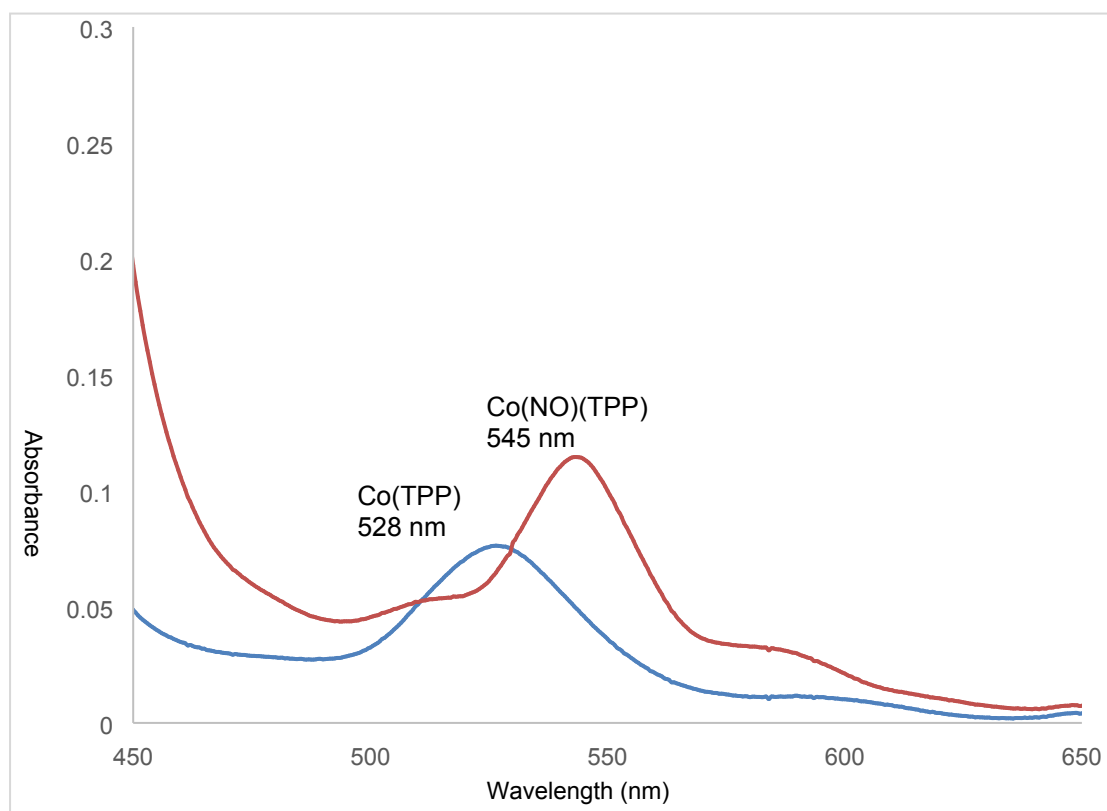

Fig. S9. UV-visible spectra (450-700 nm region) of [Co(TPP)] (0.059 mM in THF, blue) and [Co(NO)(TPP)] species that was generated upon reacting [Co(TPP)] with NO released from the reaction of **1** (10 mg, 0.076 mmol) with **2** (5.5 mg, 0.076 mmol) in tetrahydrofuran at room temperature.

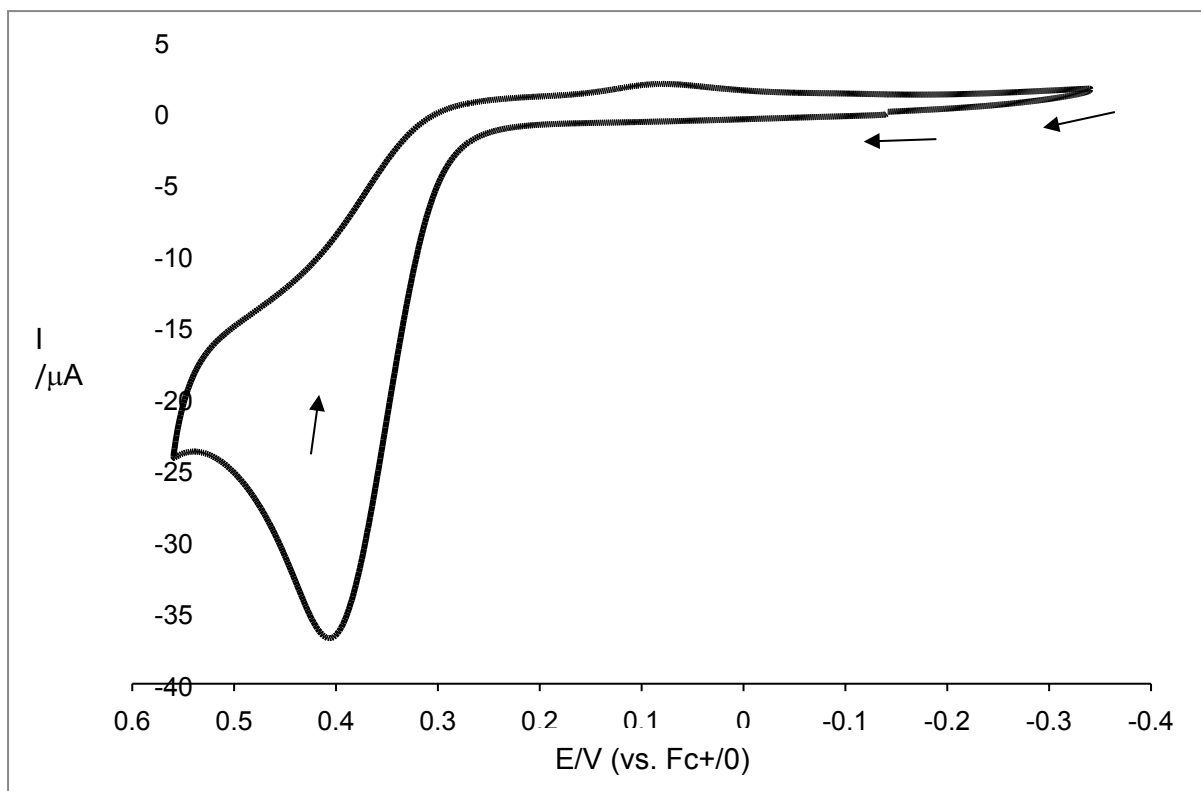

Figure S10. CV of  $[\text{nBu}_4\text{N}][\text{Ru}(\text{N})(\text{cat})_2]$ ; measured at a glassy carbon electrode in  $\text{CH}_2\text{Cl}_2$ , supporting electrolyte: 0.2 M of  $[\text{nBu}_4\text{N}][\text{PF}_6]$ , scan rate =  $100 \text{ mVs}^{-1}$ .

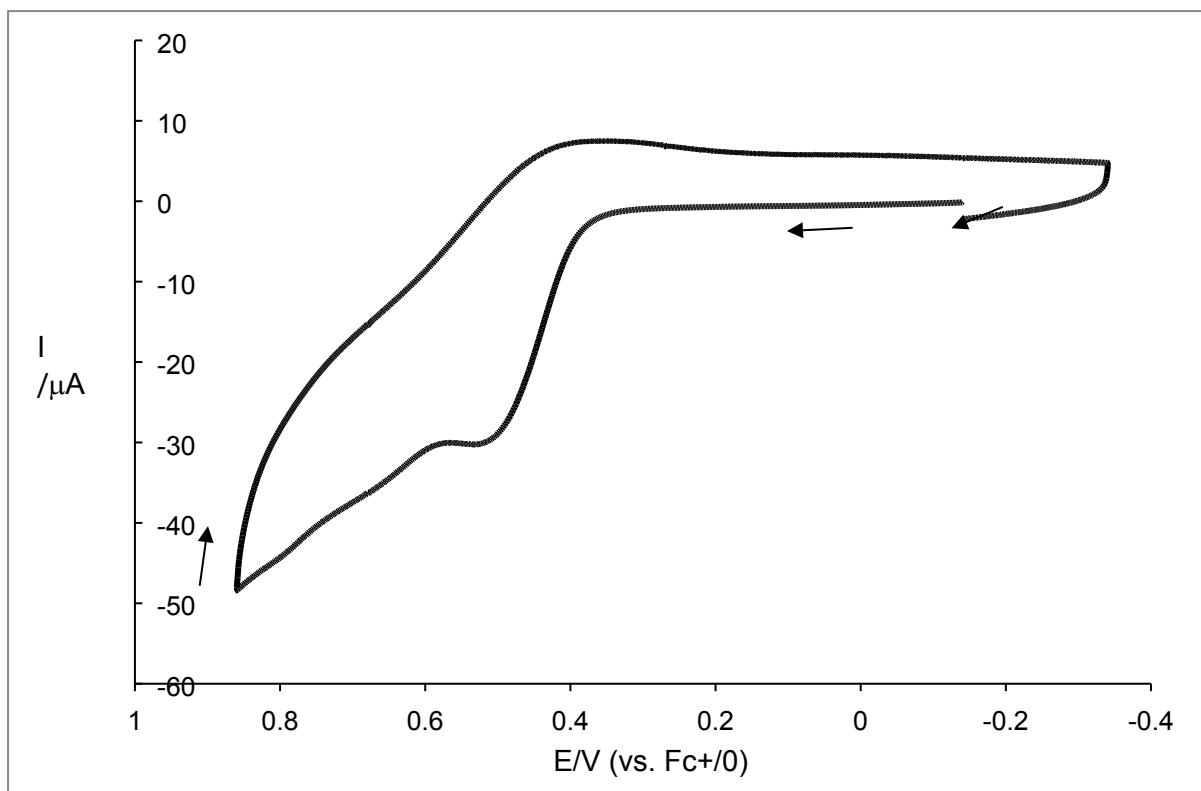

Figure S11. CV of  $[\text{nBu}_4\text{N}][\text{Os}(\text{N})(\text{cat})_2]$ ; measured at a glassy carbon electrode in  $\text{CH}_2\text{Cl}_2$ , supporting electrolyte: 0.2 M of  $[\text{nBu}_4\text{N}][\text{PF}_6]$ , scan rate =  $100 \text{ mVs}^{-1}$ .
